# Supplementary material
Source: publisher figshare collection journal article supplement (https://sage.figshare.com/ndownloader/files/14924204)
Supplement: Supplementary file 1 [file 14924204]

**Supplemental Table S4.** Percentage of patients achieving Psoriasis Area and Severity Index (PASI) 50, PASI 75, and PASI 90 at weeks 12, 24, 36, and 48 during secukinumab treatment.

|         | PASI 50 (%)            |                     |            |                    | PASI 75 (%)            |                     |          |                   | PASI 90 (%)                |                     |         |                   |
|---------|------------------------|---------------------|------------|--------------------|------------------------|---------------------|----------|-------------------|----------------------------|---------------------|---------|-------------------|
|         | Without<br>bio-failure | With<br>bio-failure | P<br>value | Total              | Without<br>bio-failure | With<br>bio-failure | P value  | Total             | Without<br>bio-failu<br>re | With<br>bio-failure | P value | Total             |
| Week 4  | 40/53<br>(75.5%)       | 42/65<br>(64.6%)    | 0.20       | 82/118<br>(69.5%)  | 14/53<br>(28.7%)       | 26/65<br>(38.5%)    | 0.25     | 40/118<br>(33.9%) | 8/53<br>(15.1%)            | 10/65<br>(15.4%)    | 0.97    | 18/118<br>(15.3%) |
| week 12 | 50/50<br>(100%)        | 57/65<br>(87.7%)    | 0.01*      | 107/115<br>(93.0%) | 39/50<br>(78.0%)       | 35/65<br>(53.8%)    | 0.007**  | 74/115<br>(64.3%) | 15/50<br>(30.0%)           | 17/65<br>(26.2%)    | 0.65    | 32/115<br>(27.8%) |
| Week 24 | 43/43<br>(100%)        | 50/57<br>(87.7%)    | 0.02*      | 93/100<br>(93%)    | 34/43<br>(79.1%)       | 29/57<br>(50.9%)    | <0.004** | 63/100<br>(63%)   | 14/43<br>(32.6%)           | 18/57<br>(31.6%)    | 0.92    | 32/100<br>(32.0%) |
| Week 36 | 26/28<br>(92.9%)       | 42/50<br>(84.0%)    | 0.26       | 68/78<br>(87.2%)   | 20/28<br>(71.4%)       | 27/50<br>(54.0%)    | 0.13     | 47/78<br>(60.3%)  | 16/28<br>(57.1%)           | 11/50<br>(22.0%)    | 0.002** | 27/78<br>(34.6%)  |
| Week 48 | 18/18<br>(100%)        | 31/36<br>(86.1%)    | 0.10       | 49/54<br>(90.7%)   | 13/18<br>(72.2%)       | 16/36<br>(44.4%)    | 0.054    | 29/54<br>(53.7%)  | 8/18<br>(44.4%)            | 7/36<br>(19.4%)     | 0.053   | 15/54<br>(27.8%)  |

\*p < 0.05, \*\*p < 0.01, \*\*\*p < 0.001 for comparison between patients with and without prior biologic failure.
